# Supplementary material
Source: PubMed Central journal article supplement (PMC5669040)
Supplement: NIHMS915359-supplement-Supplemental_Figure_1.pdf [file NIHMS915359-supplement-Supplemental_Figure_1.pdf]

Supplemental Figure 1: Reported quit attempts stratified by current use of a flavored tobacco product

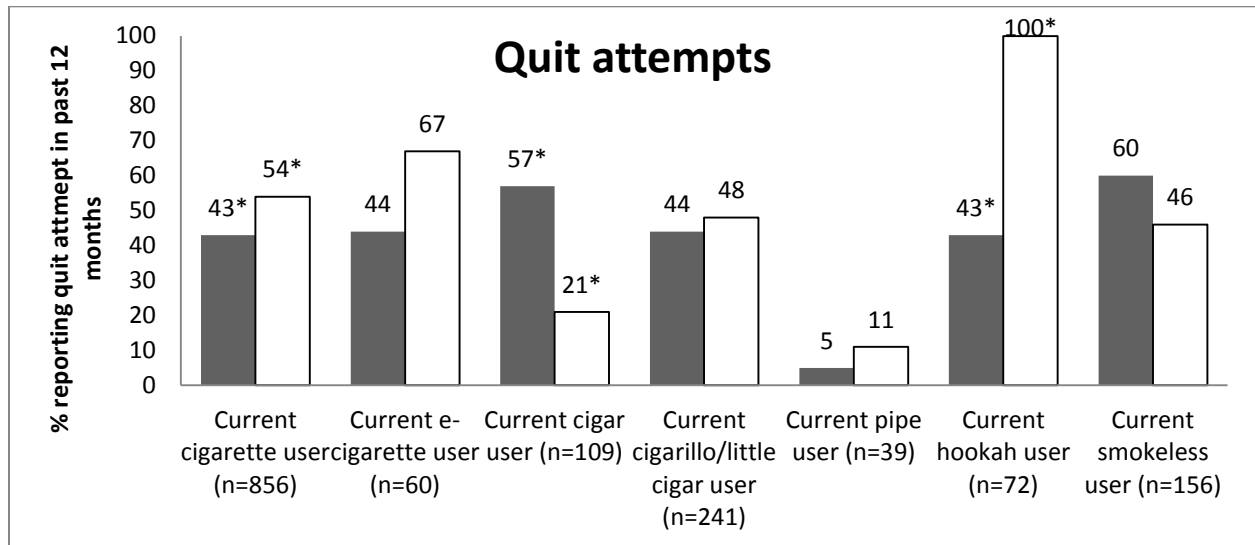

\*Denotes statistically significant differences according to Pearson chi-square test. Sample sizes reflect current tobacco users asked about attempts to quit
